# Supplementary material for: Assessing the Genetic Influence of Ancient Sociopolitical Structure: Micro-differentiation Patterns in the Population of Asturias (Northern Spain)
Source: PubMed Central journal article supplement (PMC3507697; doi:10.1371/journal.pone.0050206), 2012-11-27
Supplement: pone.0050206.s002.pdf [file pone.0050206.s002.pdf]

TABLE S2

Additional genetic data used in the population differentiation analyses.

| Mitochondrial DNA <sup>a</sup> |         |                      | Y-Chromosome <sup>b</sup> |         |                           |
|--------------------------------|---------|----------------------|---------------------------|---------|---------------------------|
| Region                         | Samples | Reference            | Region                    | Samples | Reference                 |
| Galicia                        | 32      | (Prieto et al. 2011) | Galicia                   | 88      | (Adams et al. 2008)       |
| Cantabria                      | 19      | (Behar et al. 2012)  | Cantabria                 | 104     | (Zarrabeitia et al. 2003) |
| Castilla-Leon                  | 32      | (Prieto et al. 2011) | Castilla-Leon             | 100     | (Adams et al. 2008)       |

<sup>a</sup> Full control region sequences (np. 16024-576).

<sup>b</sup> Haplotypes defined by 9 Y-STRs (DYS19, DYS389a, DYS389B, DYS390, DYS391, DYS392, DYS393, DYS460, DYS461).
